# Supplementary material for: Utilization of modified Dioscorea opposita Thunb. as a novel biosorbent for the adsorption of indigo carmine in aqueous solutions
Source: Royal Society of Chemistry journal article supplement (doi:10.1039/c8ra05106b), 2018-01-01
Supplement: c8ra05106b1.pdf [file c8ra05106b1.pdf]

***Utilization of modified *Dioscorea opposita* Thunb as a novel biosorbent  
for the adsorption of indigo carmine in aqueous solutions***

**Yanzhuo Zhang<sup>a\*</sup>, Jun Li<sup>b</sup>**

<sup>a</sup>*School of Environment, Henan Normal University, Key Laboratory for Yellow River and Huai River Water Environmental and Pollution Control, Ministry of Education, Henan Key Laboratory for Environmental Pollution Control, Xinxiang, Henan 453007, P. R. China.*

<sup>b</sup>*The College of Architecture and Civil Engineering, The Key Laboratory of Beijing for Water Quality Science & Water Environment Recovery Engineering, Beijing University of Technology, Beijing 100124, China*

Authors:

Yanzhuo Zhang. E-mail: 83995983@qq.com

Jun Li. E-mail: lijunbjut@163.com

\*Corresponding author: Yanzhuo Zhang

E-mail: 83995983@qq.com.

**Table S1 Element composition of DOT and DOT@PEI**

| Element | DOT                   |                       | DOT@PEI               |                       |
|---------|-----------------------|-----------------------|-----------------------|-----------------------|
|         | Weight percentage (%) | Atomic percentage (%) | Weight percentage (%) | Atomic percentage (%) |
| C       | 28.309                | 38.736                | 45.613                | 37.061                |
| O       | 51.329                | 52.725                | 51.854                | 56.122                |
| Mg      | 0.859                 | 0.581                 | 0.255                 | 0.419                 |
| Si      | 1.000                 | 0.585                 | 0.346                 | 0.657                 |
| P       | 0.902                 | 0.479                 | 0.178                 | 0.374                 |
| S       | 1.294                 | 0.663                 | 0.089                 | 0.193                 |
| Cl      | 0.905                 | 0.419                 | 0.142                 | 0.341                 |
| K       | 8.051                 | 3.384                 | 0.448                 | 1.186                 |
| Ca      | 3.585                 | 1.470                 | 0.635                 | 1.721                 |
| Fe      | 0.265                 | 0.078                 | 0.026                 | 0.099                 |
| Zn      | 3.502                 | 0.880                 | 0.413                 | 1.827                 |

### Figure Captions

**Fig. S1** SEM micrographs of (a) DOT and (b) DOT@PEI

**Fig. S2** EDS spectra of (a) DOT and (b) DOT@PEI

**Fig. S3** FTIR spectra of biosorbents: (a) DOT, (b) DOT@PEI

**Fig. S4** BET isotherm of DOT@PEI

**Fig. S5** The zeta potential of DOT and DOT@PEI (s) at varied pH conditions.

**Fig. S6** Plots of (a) Langmuir isotherm model for the adsorption of Indigo Carmine onto the DOT@PEI at 20°C.

**Fig. S7** Plots of (a) Freundlich isotherm models for the adsorption of Indigo Carmine onto the DOT@PEI at 20°C.

**Fig. S8** Plots of (a) Temkin isotherm models for the adsorption of Indigo Carmine onto the DOT@PEI at 20°C.

**Fig. S9** Pseudo-First-Order Kinetic Model for adsorption of Indigo Carmine onto the DOT@PEI at 20°C.

**Fig. S10** Pseudo-Second-Order Kinetic Model for adsorption of Indigo Carmine onto the DOT@PEI at 20°C.

**Fig. S11** Intraparticle diffusion model for adsorption of Indigo Carmine onto the DOT@PEI at 20°C.

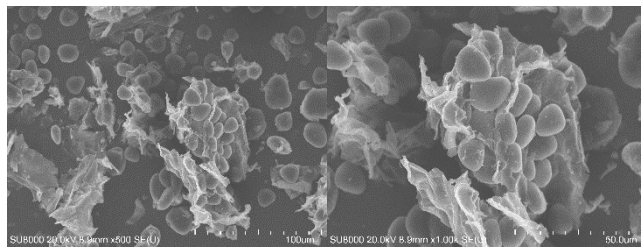

500×

1000×

(a) DOT

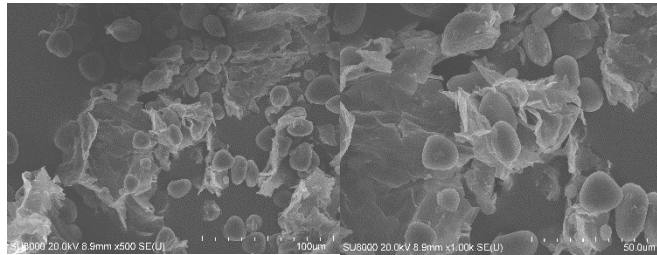

500×

1000×

(b) DOT@PEI

**Fig. S1 SEM micrographs of (a) DOT and (b) DOT@PEI**

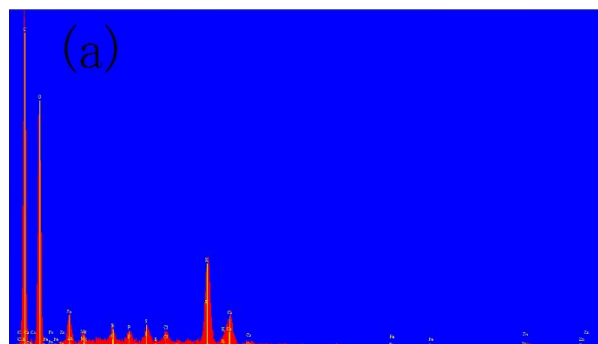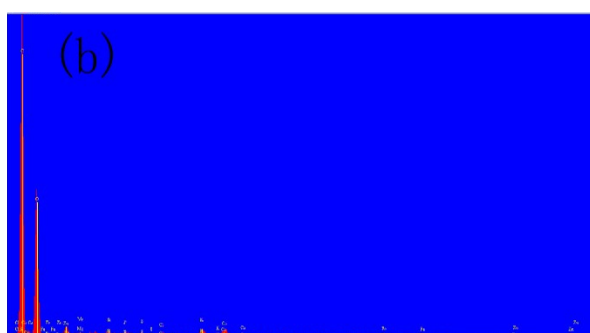

**Fig. S2 EDS spectra of (a) DOT and (b) DOT@PEI**

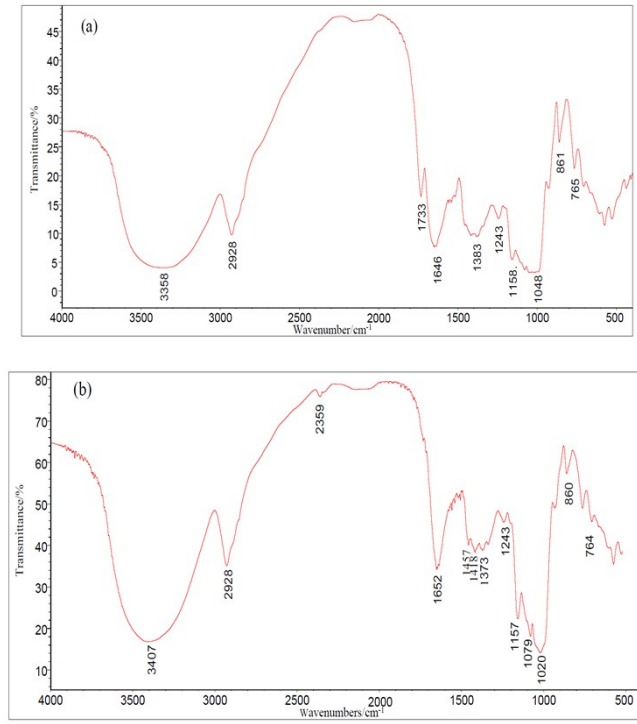

**Fig. S3 FTIR spectra of biosorbents: (a) DOT, (b) DOT@PEI**

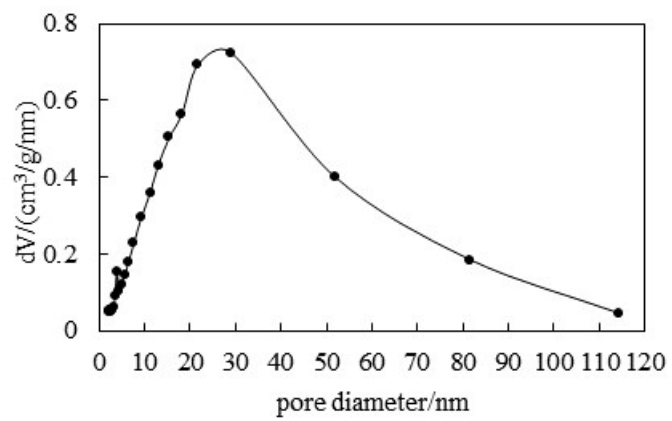

**Fig. S4 BET isotherm of DOT@PEI**

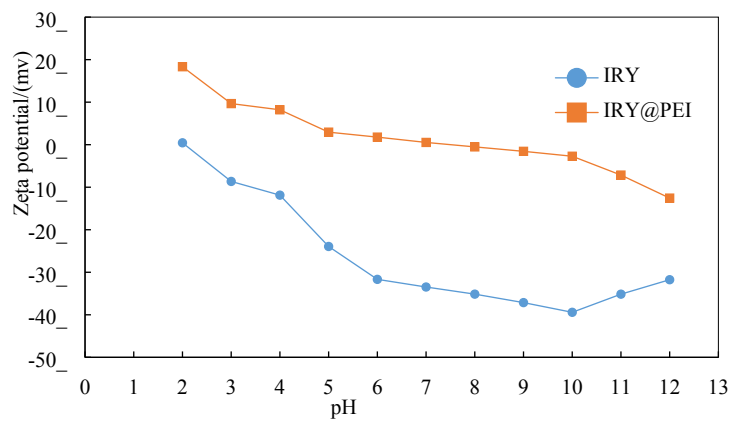

**Fig. S5 The zeta potential of DOT and DOT@PEI (s) at varied pH conditions.**



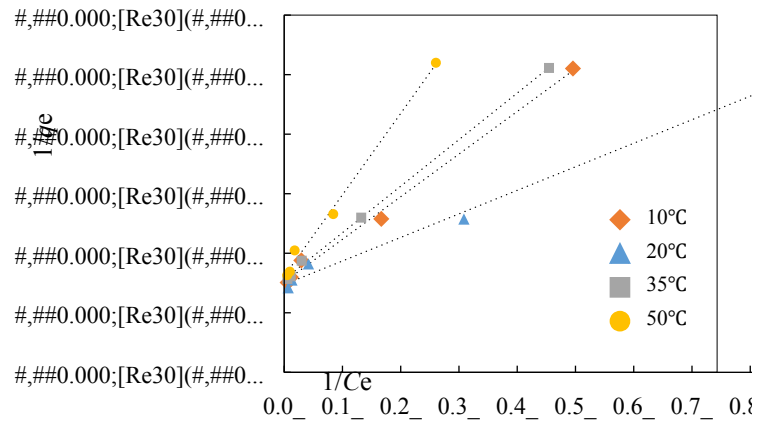

**Fig. S6 Plots of (a) Langmuir isotherm model for the adsorption of Indigo Carmine onto the DOT@PEI at 20°C.**

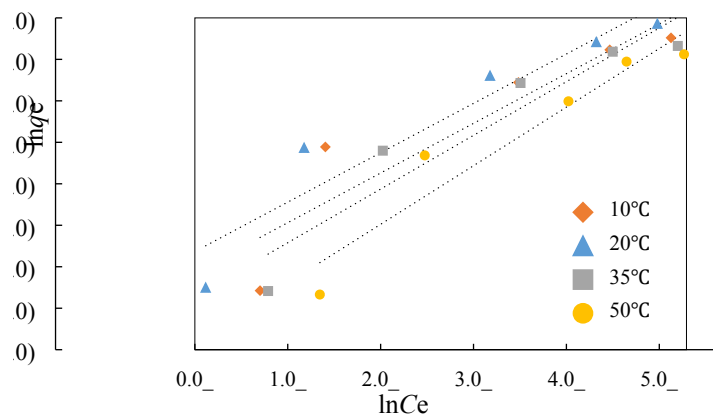

**Fig. S7 Plots of (a) Freundlich isotherm models for the adsorption of Indigo Carmine onto the DOT@PEI at 20°C.**

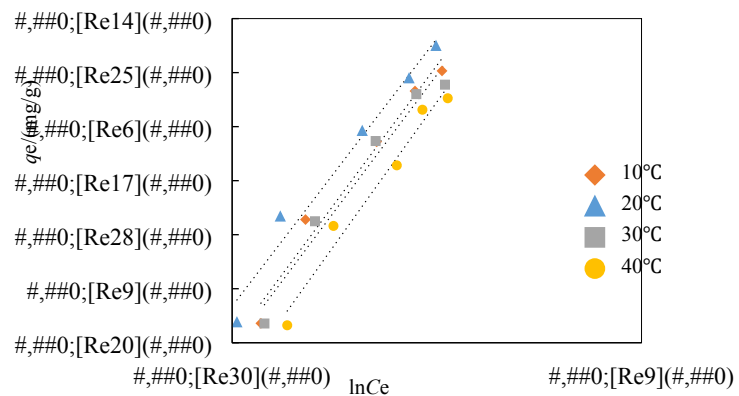

**Fig. S8 Plots of (a) Temkin isotherm models for the adsorption of Indigo Carmine onto the DOT@PEI at 20°C.**

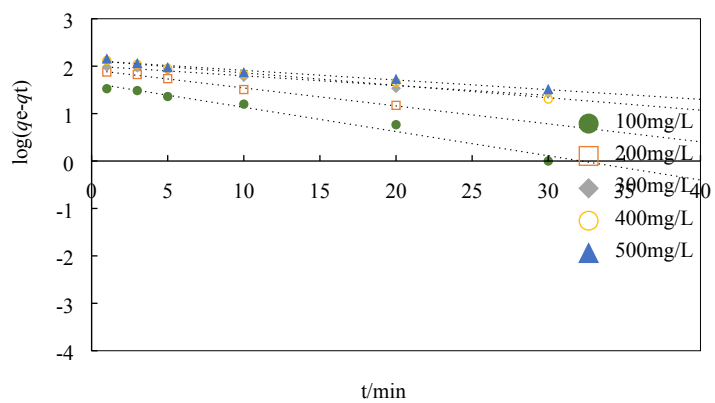

**Fig. S9 Pseudo-First-Order Kinetic Model for adsorption of Indigo Carmine onto the DOT@PEI at 20°C.**

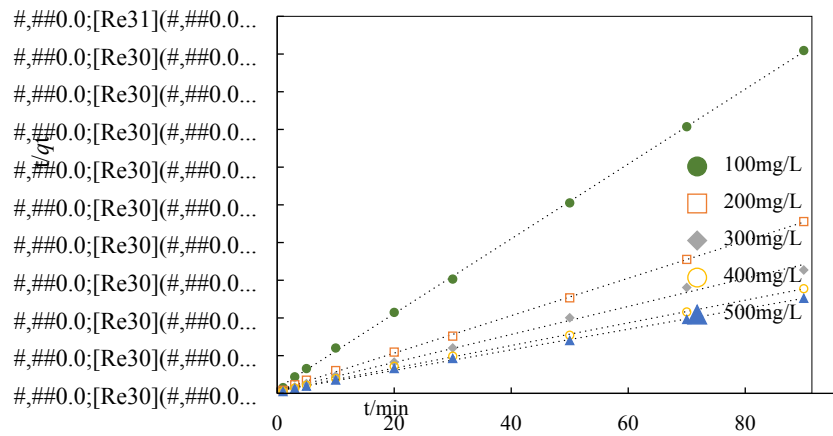

**Fig. S10 Pseudo-Second-Order Kinetic Model for adsorption of Indigo Carmine onto the DOT@PEI at 20°C.**

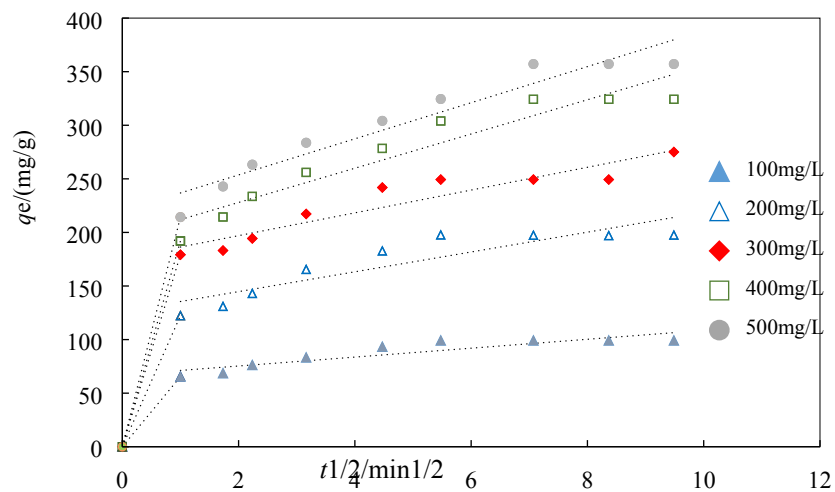

**Fig. S11** Intraparticle diffusion model for adsorption of Indigo Carmine onto the DOT@PEI at 20°C.
